# Supplementary material for: CD4+ T cell-induced inflammatory cell death controls immune-evasive tumours
Source: PubMed Central journal article supplement (PMC10307640; doi:10.1038/s41586-023-06199-x), 2023-06-14
Supplement: 41586_2023_6199_MOESM1_ESM.pdf [file 41586_2023_6199_MOESM1_ESM.pdf]

---

**Supplementary information**

---

**CD4<sup>+</sup> T cell-induced inflammatory cell death controls immune-evasive tumours**

---

In the format provided by the authors and unedited

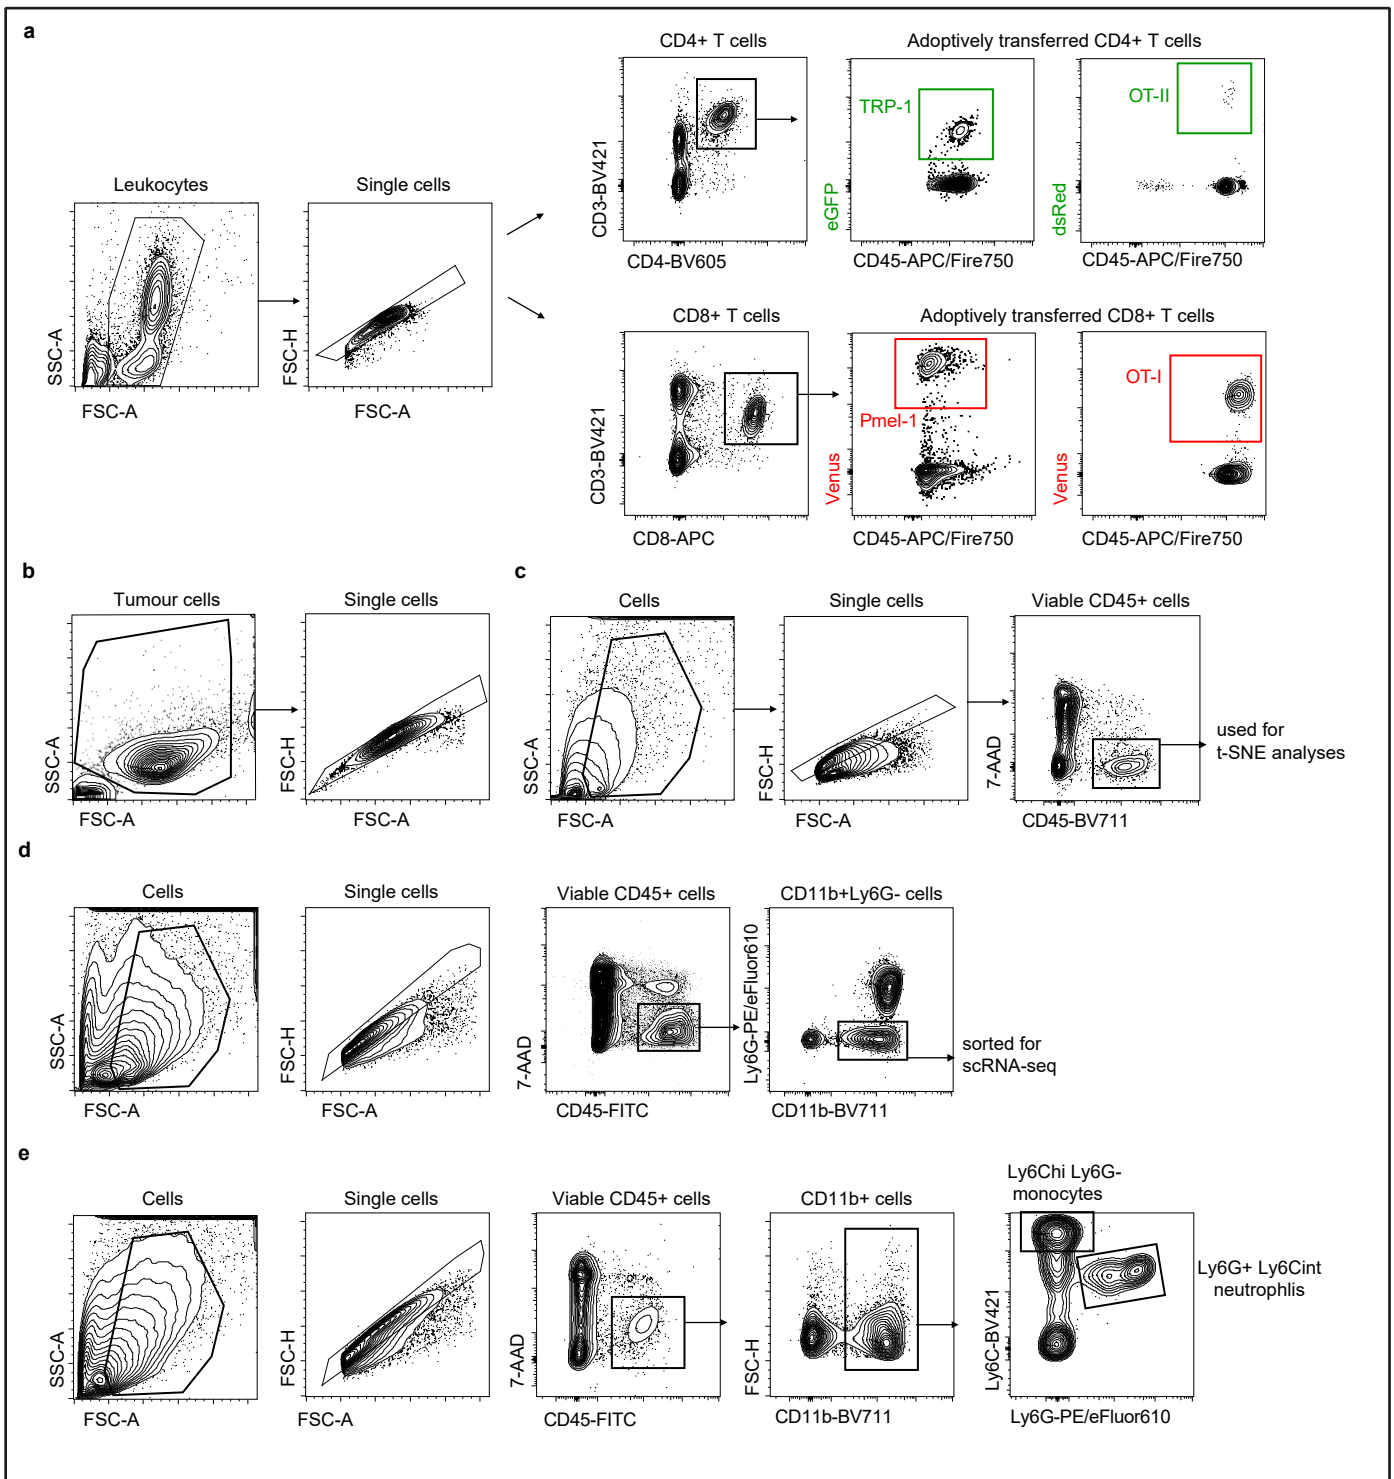

**Supplementary Figure 1 | Gating strategies used for flow cytometric analyses and cell sorting.**

**a**, Gating strategy to determine the percentage of adoptively transferred TRP-1, Pmel-1, OT-II or OT-I T cells out of all CD4+ or CD8+ T-cells, presented in Extended Data Fig. 2b and Extended Data Fig. 3g. **b**, Gating strategy to determine single tumour cells from *in vitro* cultures, used for further analysis on MHC-I and MHC-II expression, presented in Extended Data Fig. 2j and Extended data Fig. 3a, and cell death assays presented in Figure 4e,f and Extended Data Fig. 9g,h. **c**, Gating strategy to determine viable CD45+ immune cells used for subsequent t-SNE analyses, presented in Figure 1j,p; Figure 3f; Extended Data Fig. 2g,h, Extended Data Fig. 3d,e and Extended Data Fig. 7g,h. **d**, Gating strategy to sort viable CD45+CD11b+Ly6G- myeloid cells for single cell RNA-sequencing analyses presented in Figure 3a-e and Extended Data Fig. 7a-f. **e**, Gating strategy to determine the cells per mg tumour weight of Ly6ChiLy6G- monocytes and Ly6G+Ly6Cint neutrophils, presented in Extended Data Fig. 8b,g; Extended Data Fig. 9e, and the percentage of iNOS-expressing Ly6ChiLy6G- monocytes and Ly6G+Ly6Cint neutrophils, presented in Figure 3h,k and Extended Data Fig. 8b,g.

**Supplementary Table 1:** sgRNA sequences used for CRISPR/Cas9-mediated cell engineering

|                                |                       |
|--------------------------------|-----------------------|
| Guide sequence <i>Jak1</i> #1  | TCCGTCTTGGGGTCCCGAAT  |
| Guide sequence <i>Jak1</i> #2  | CTCCGTCTTGGGGTCCCGAA  |
| Guide sequence <i>Jak1</i> #3  | GTTCTCGGCAATACGTTAC   |
| Guide sequence <i>Ciita</i> #1 | GGGGTCTGGCATCACTGTTA  |
| Guide sequence <i>Trp1</i> #1  | GAGCCGCCATTATCCCCACGA |
| Guide sequence <i>Trp1</i> #2  | GACTGTGGGACTTGCCGTCCT |
| Guide sequence <i>Trp1</i> #3  | GAACTGTGGGACTTGCCGTCC |
| Guide sequence <i>Tyr</i> #1   | GAATGCTGCCACCATGGAT   |
